# Supplementary material for: Hierarchical poly(2-aminothiophenol)/Co–Ni heterostructures with nanoflake–nanoneedle architecture for high-performance supercapacitors
Source: Royal Society of Chemistry journal article supplement (doi:10.1039/d5ra09024e), 2026-05-08
Supplement: d5ra09024e1.pdf [file d5ra09024e1.pdf]

## **Hierarchical Poly(2-aminothiophenol)/Co-Ni Heterostructures with Nanoflake-Nanoneedle Architecture for High-Performance Supercapacitors**

Aya Fathy <sup>1</sup>, Ashour M. Ahmed <sup>2</sup>, M. A. Basyooni-M. Kabatas <sup>3,4\*</sup>, Mamduh J. Aljaafreh <sup>2</sup>, Mohamed Shaban <sup>5</sup>, Hany Hamdy <sup>1</sup>, Mohamed Rabia <sup>6</sup>

<sup>1</sup> Nanophotonics and Applications Lab, Physics Department, Faculty of Science, Beni-Suef University, Beni-Suef 62514, Egypt

<sup>2</sup> Physics Department, College of Science, Imam Mohammad Ibn Saud Islamic University (IMSIU), Riyadh 11623, Saudi Arabia

<sup>3</sup> Department of Precision and Microsystems Engineering, Delft University of Technology, Mekelweg 2, 2628 CD Delft, The Netherlands

<sup>4</sup> Institute of Nanotechnology (INT), Karlsruhe Institute of Technology (KIT), Kaiserstraße 12, 76131 Karlsruhe, Germany

<sup>5</sup> Physics Department, Faculty of Science, Islamic University of Madinah, Madinah, Saudi Arabia

<sup>6</sup> Nanomaterials Science Research Laboratory, Chemistry Department, Faculty of Science, Beni-Suef University, Beni-Suef, Egypt

\* Corresponding author: M. A. Basyooni-M. Kabatas (m.kabatas@tudelft.nl or m.kabatas@kit.edu)

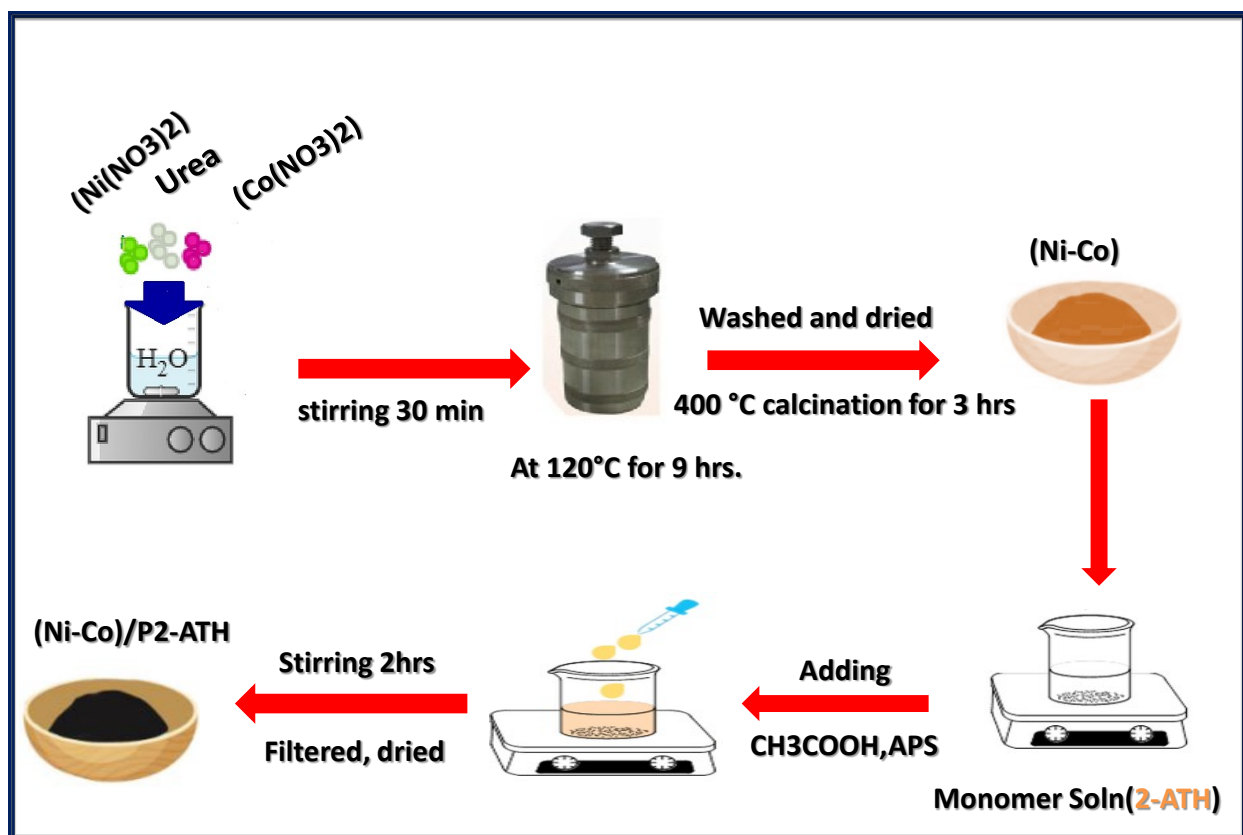

Figure S1. The schematic diagram for the preparation of P2-ATH/CNO-CCHH heterostructure

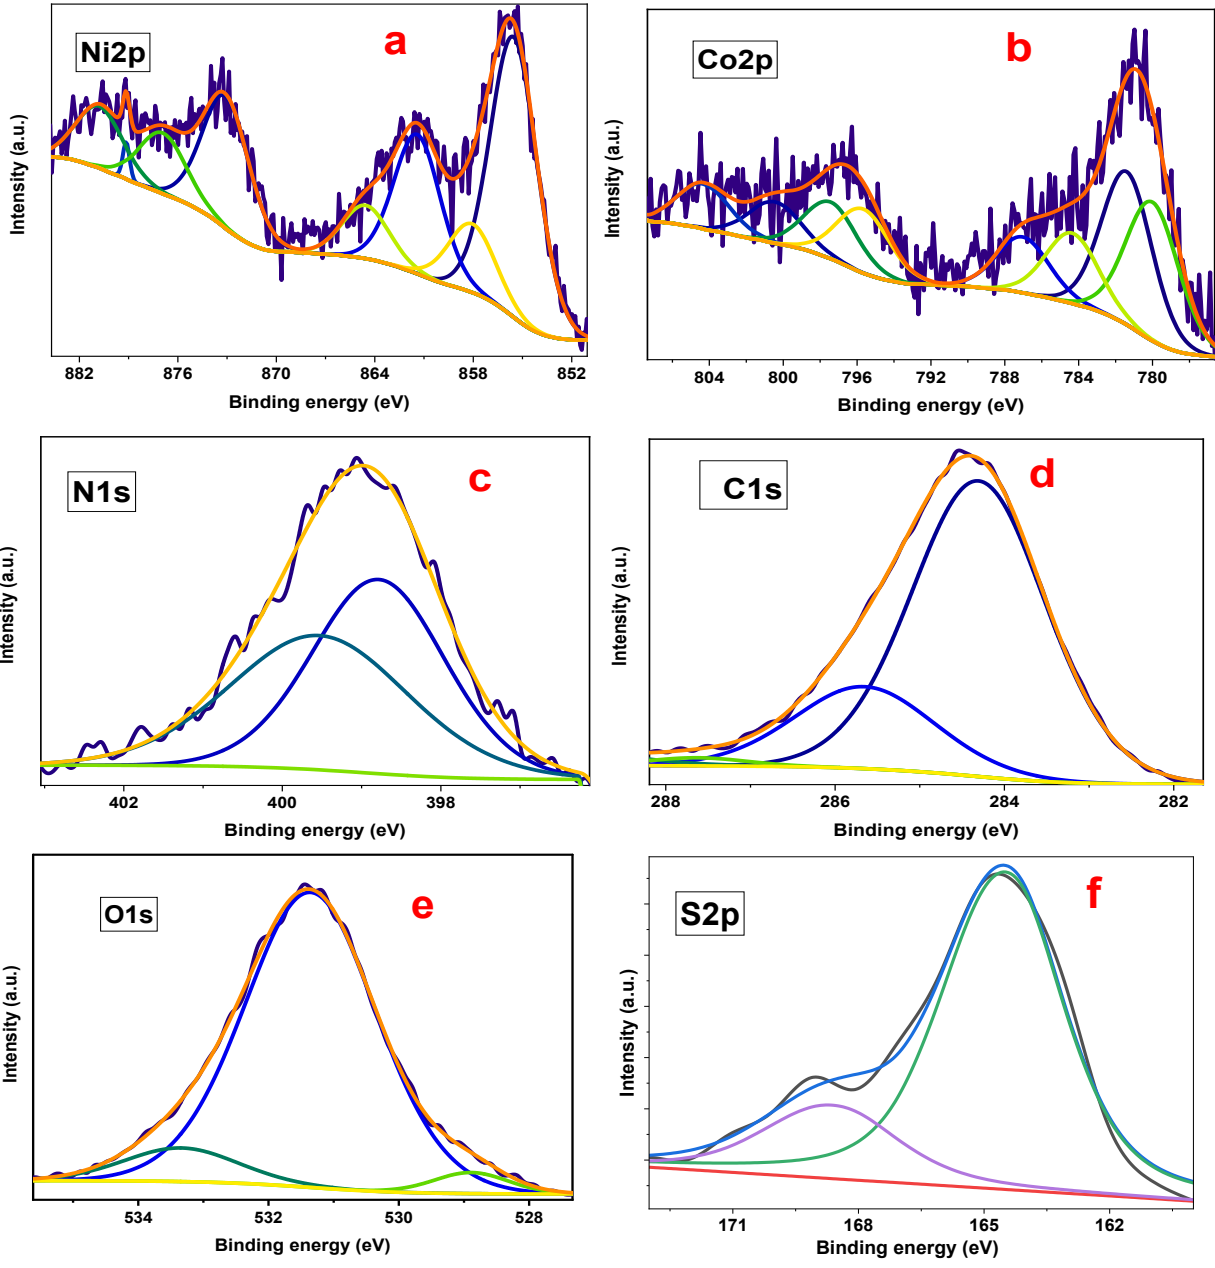

Figure S2. High-resolution XPS analysis of P2-ATH/CNO-CCHH heterostructure; (a) Ni2p, (b) Co2p, (c) N1s, (d) C1s, (e) O1s, and (f) S2p

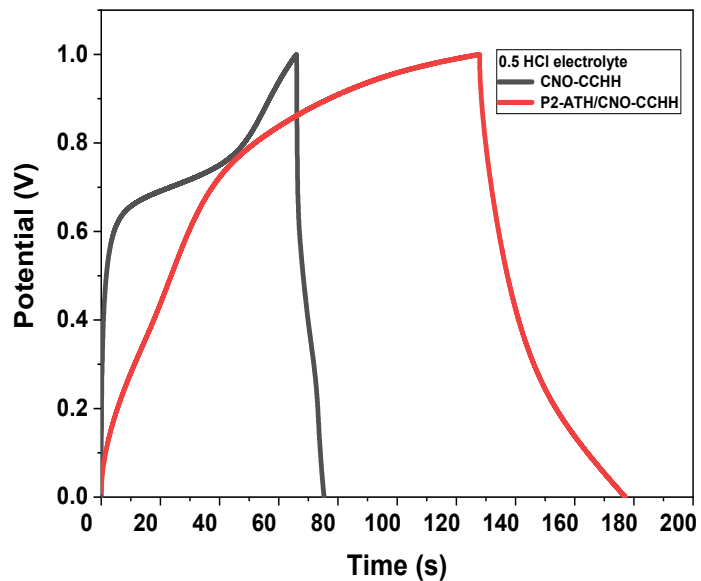

Figure S3. GCD profiles of CNO-CCHH and P2-ATH/CNO-CCHH electrodes in 0.5 HCl

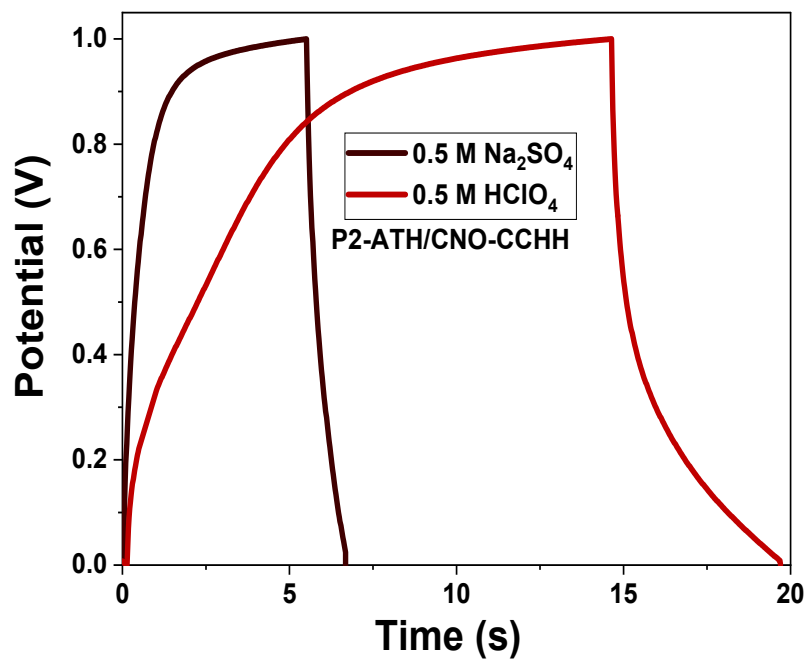

Figure S4. GCD profiles of P2-ATH/CNO-CCHH electrodes in 0.5 M Na<sub>2</sub>SO<sub>4</sub> and 0.5 M HClO<sub>4</sub>

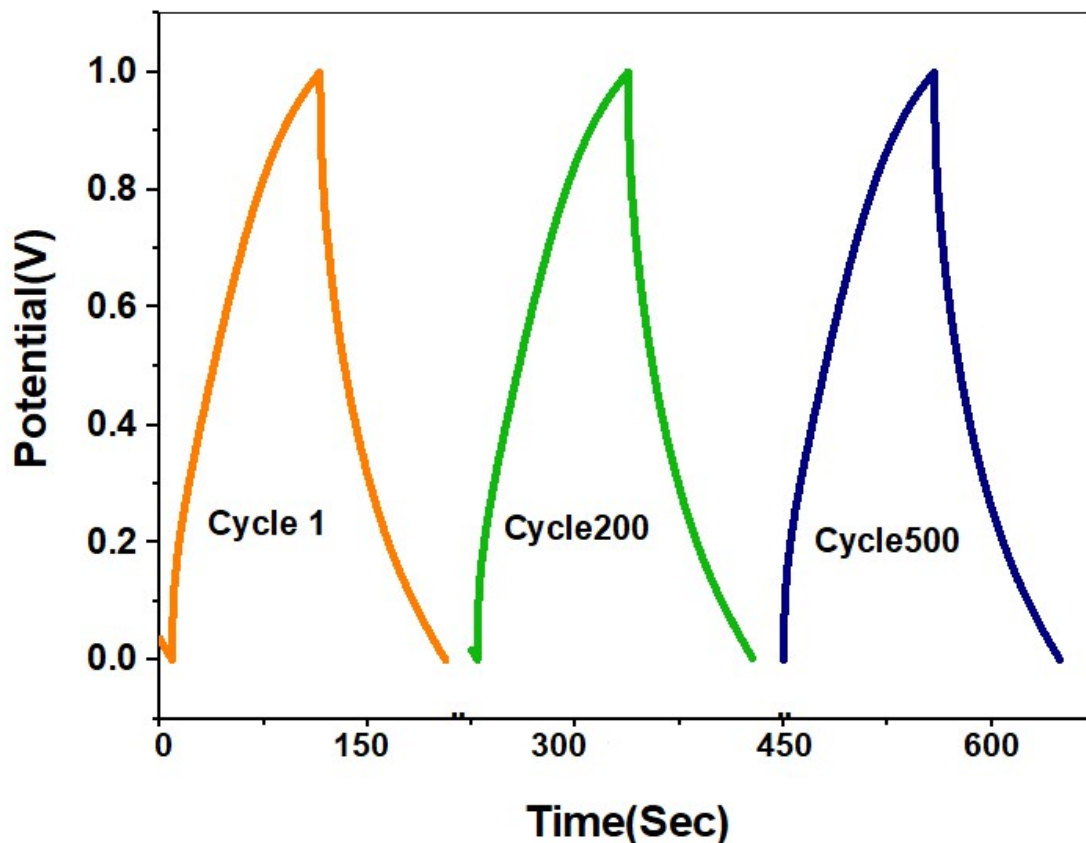

Figure S5. The stability performance of P2-ATH/CNO-CCHH heterostructure in 0.5 M HCl for 1000 cycles

Table S1. The FTIR analysis of the P2-ATH/CNO-CCHH heterostructure

| Band Position (cm <sup>-1</sup> ) | Assignment                                                                               | Ref      |
|-----------------------------------|------------------------------------------------------------------------------------------|----------|
| 3756.5 - 3692.6                   | Broadband for stretching vibration of hydroxyl groups (OH) linking with Co and Ni atoms. | [S1]     |
| 3354 - 3438.1                     | N-H, S-H stretching of the primary amine confirms the amino group                        | [S2, S3] |
| 3054.4                            | C-H stretching vibration of the various alkane groups                                    | [S4]     |
| 1470.1                            | C=C vibration in the benzenoid ring                                                      | [S5]     |

|        |                                                                           |            |
|--------|---------------------------------------------------------------------------|------------|
| 1376.5 | C-N stretching vibrations                                                 | [S6]       |
| 1124.8 | Ni-O stretching vibrations                                                | [S7]       |
| 1040.2 | C-H in-plane bending vibration                                            | [S8]       |
| 962.2  | C-S group band                                                            | [S9]       |
| 825.2  | Out-of-plane C-H deformation showing ortho disubstitution in benzene ring | [S2]       |
| 752.2  | Indicating specific chemical interactions within the polymer structure    | [S10]      |
| 634.4  | Carbonate group ( $\text{CO}_3^{2-}$ )                                    | [S11, S12] |
| 539.2  | Bonds of Ni-O and Co-O with vibrations overlapping                        | [S13]      |
| 451.5  | Co-OH stretching                                                          | [S12]      |

Reference:

- S1. Wang, J., et al., Quantitative determination of titanium lattice defects and solid-state reaction mechanism in iron-doped TiO<sub>2</sub> photocatalysts. 2001. **105**(40): p. 9692-9698.
- S2. Rabia, M. and M.A.J.J.o.E.M. Alnuwaiser, Fabrication of a Photocathode Based on Silver Iodide/Poly-2-Aminothiophenol with High Optical Absorbance Related to Intercalated Iodide Ions for Hydrogen Generation from Wastewater Without a Sacrificial Agent. 2024: p. 1-13.
- S3. Nabid, M.R., et al., Preparation and application of poly (2-amino thiophenol)/MWCNTs nanocomposite for adsorption and separation of cadmium and lead ions via solid phase extraction. 2012. **203**: p. 93-100.
- S4. Rana, S.B., et al., Influence of surface modification by 2-aminothiophenol on optoelectronics properties of ZnO nanoparticles. 2014. **9**(9): p. 877-891.
- S5. Mosa, J., et al., Synthesis of poly (phenylene oxide)-based fluoro-tin-oxide/ZrO<sub>2</sub> nanoelectrode arrays by hybrid organic/inorganic approach. 2011. **56**(20): p. 7155-7162.

- S6. Sayyah, S., M. Shaban, and M.J.A.i.P.T. Rabia, Electropolymerization of m-toluidin on platinum electrode from aqueous acidic solution and character of the obtained polymer. 2018. **37**(1): p. 126-136.
- S7. ur Rehman, M.N., et al., Facile synthesis and characterization of conducting polymer-metal oxide based core-shell PANI-Pr<sub>2</sub>O–NiO–Co<sub>3</sub>O<sub>4</sub> nanocomposite: As electrode material for supercapacitor. 2021. **47**(13): p. 18497-18509.
- S8. Boomi, P., et al., Improved conductivity and antibacterial activity of poly (2-aminothiophenol)-silver nanocomposite against human pathogens. 2018. **178**: p. 323-329.
- S9. Kabel, K.I., et al., Assessment of corrosion inhibitive behavior of 2-aminothiophenol derivatives on carbon steel in 1 M HCl. 2015. **23**: p. 57-66.
- S10. Rabia, M., E. Aldosari, and A.A.A.J.J.o.M.S.M.i.E. Abdelazeez, An advanced optoelectronic apparatus utilizing poly (2-amino thiophenol) adorned with a needle-shaped MnS-MnO<sub>2</sub> nanocomposite. 2024. **35**(6): p. 377.
- S11. Rahimi-Nasrabadi, M., et al., Cobalt carbonate and cobalt oxide nanoparticles synthesis, characterization and supercapacitive evaluation. Journal of Materials Science: Materials in Electronics 2017. **28**(2): p. 1877-1888.
- S12. Guellati, O., et al., Electrochemical measurements of 1D/2D/3DNi-Co bi-phase mesoporous nanohybrids synthesized using free-template hydrothermal method. 2018. **275**: p. 155-171.
- S13. Isari, A.A., et al., N, Cu co-doped TiO<sub>2</sub>@ functionalized SWCNT photocatalyst coupled with ultrasound and visible-light: an effective sono-photocatalysis process for pharmaceutical wastewaters treatment. 2020. **392**: p. 123685.
